# Supplementary material
Source: publisher figshare collection journal article supplement (https://acs.figshare.com/ndownloader/files/10689178)
Supplement: Supplementary file 1 [file 10689178]

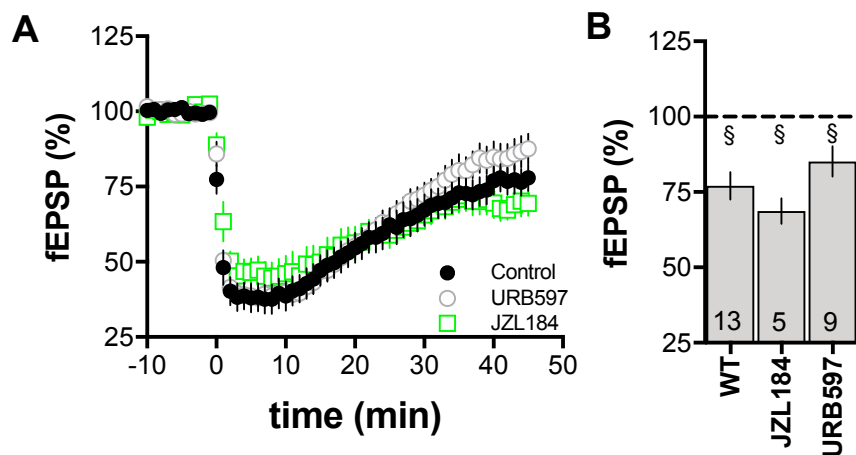

**Supplementary Figure 1 Effect of Blockade of 2-AG and Anandamide degradation on high Carbachol LTD in slices from Wild type littermates** A,B) Summary graph showing that high Carbachol-LTD is not changed in slices incubated with JZL184 or URB597 B) Summary graph showing that high Carbachol-LTD is abolished in *fmr1*<sup>-/-</sup> mice. Error bars represent mean ± s.e.m. \* § p<0.05, students t-test. The number in each bar indicates the number of experiments.

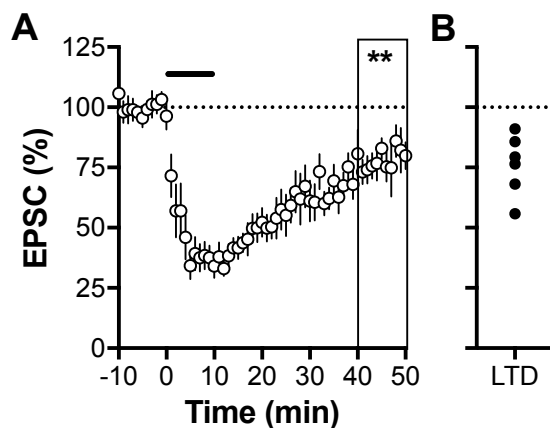

**Supplementary Figure 2 Whole Cell patch clamp recordings of accumbens MSNs.**

**A)** Averaged patch clamp recordings of AMPAR responses. 100  $\mu$ M Carbachol induced strong STD and LTD. **B)** The average LTD values of this dataset indicate that all cells recorded expressed LTD.

**Patch clamp recordings:** For whole cell patch-clamp experiments, neurons were visualized using an upright microscope (Olympus BX-51W) with infrared illumination. The intracellular solution contained in mM: 145 K<sup>+</sup> gluconate, 3 NaCl, 1 MgCl<sub>2</sub>, 1 EGTA, 0.3 CaCl<sub>2</sub>, 2 Na<sub>2</sub><sup>+</sup>ATP, and 0.3 Na<sup>+</sup> GTP, 0.2 cAMP, buffered with 10 HEPES. The pH was adjusted to 7.2 and osmolarity to 290-300 mOsm. Electrode resistance was 4-6 MOhms.

A -2 mV hyperpolarizing pulse was applied before each evoked EPSC in order to evaluate the access resistance and those experiments in which this parameter changed >25% were rejected. Access resistance compensation was not used and acceptable access resistance was <30 MOhms. The potential reference of the amplifier was adjusted to zero prior to breaking into the cell. Cells were held at -70mV.
